# Supplementary material for: Enhanced nonlinear optical response of graphene-based nanoflake van der Waals heterostructures
Source: Royal Society of Chemistry journal article supplement (doi:10.1039/d0ra09636a), 2021-01-01
Supplement: d0ra09636a1.pdf [file d0ra09636a1.pdf]

## Electronic Supplementary Information

### **Enhanced Nonlinear Optical Response of Graphene-based Nanoflake van der Waals Heterostructures**

Sumandeep Kaur<sup>1</sup>, Ravindra Pandey<sup>1\*</sup>, and Shashi P. Karna<sup>2\*</sup>

<sup>1</sup>Department of Physics, Michigan Technological University, Houghton, Michigan 49931, USA.

<sup>2</sup>Weapons and Materials Research Directorate, U.S. Army Research Laboratory, ATTN: RDRL-WM, Aberdeen Proving Ground, Aberdeen, Maryland 21005-5069, USA.

(January 15, 2021)

**Email:** [pandey@mtu.edu](mailto:pandey@mtu.edu), [shashi.p.karna.civ@mail.mil](mailto:shashi.p.karna.civ@mail.mil)

## 1. Phosphorene nanoflake:

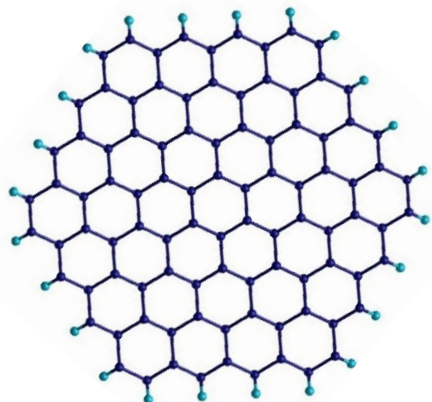

**N= 120; width $\approx$ 24 Å**  
**(a)**

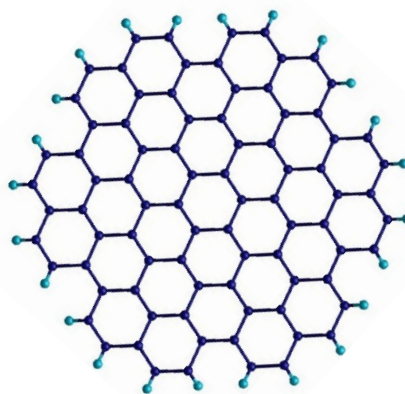

**N= 108; width $\approx$ 22 Å**  
**(b)**

**Fig. S1:** Top views of (a) zigzag phosphorene nanoflake (b) armchair phosphorene nanoflake. N is the total number of atoms.

## 2.0 Polarizability

The average polarizability,  $\langle\alpha\rangle$  is  $\frac{1}{3}(\alpha_{xx} + \alpha_{yy} + \alpha_{zz})$ , and the first hyperpolarizability,  $\beta$  is  $(\beta_x^2 + \beta_y^2 + \beta_z^2)^{\frac{1}{2}}$ . Note that  $\beta$  at  $(-w; w, 0)$  is related to the Pockels effect, and its value at  $(-2w; w, w)$  yields the second harmonic generation (SHG) effect.  $\gamma$  at  $(-w; w, 0, 0)$  is related to the optical Kerr effect (OKE) and  $\gamma$  at  $(2w; w, w, 0)$  is related to the electric field induced second harmonic generation (EFISHG) effect.

### Units:

Length, 1 a. u. = 0.529 Å

Electric dipole moment,  $\mu$

$$1 e a_0 = 1 \text{ a.u.} = 2.5418 \times 10^{-18} \text{ statvolt cm}^2$$

Polarizability,  $\alpha$

$$1 \text{ a.u.} = 1 e^2 a_0^2 E_h^{-1} = 1.4817 \times 10^{-25} \text{ cm}^3 \text{ (esu)}$$

First Dipole Hyperpolarizability,  $\beta$

$$1 \text{ a. u.} = 1 e^3 a_0^3 E_h^{-2} = 8.6392 \times 10^{-33} \text{ cm}^4 \text{ statvolt}^{-1} \text{ (esu)}$$

$$1 \text{ a. u.} = 0.51422 \text{ pm/V}$$

Second Dipole Hyperpolarizability,  $\gamma$

$$1 \text{ a.u.} = 1 e^4 a_0^4 E_h^{-3} = 5.0367 \times 10^{-40} \text{ cm}^5 \text{ statvolt}^{-2} \text{ (esu)}$$

Second-order Susceptibility,  $\chi^{(2)}$

$$1 \text{ a. u.} = 0.51422 \text{ pm/V}$$

### Conversion factor:

$$1 \text{ pm/V} = 2.387 \times 10^{-9} \text{ esu}$$

## 2.1 Graphene nanoflake: Basis set dependence of NLO polarizabilities calculated at the DFT (wB97XD) level of theory

The 6-31G basis set is the split-valence basis set, whereas the 6-31G+(d,p) basis set is supplemented by a diffuse function together with d and p-type polarization functions on C and H atoms, respectively.

**Table S1:** Zigzag and armchair graphene nanoflakes. The DFT (wB97XD) polarizabilities calculated using the 6-31G and 6-31G+(d,p) basis sets.  $\alpha$ 's,  $\beta$ 's, and  $\gamma$ 's are the polarizability, first hyperpolarizability, and second hyperpolarizability, respectively. The frequency-dependent (hyper) polarizabilities are calculated at  $\lambda=1064$  nm.

|                                                            |                | Zigzag graphene nanoflake<br>(~22 Å) |                | Armchair graphene nanoflake<br>(~24 Å) |                |
|------------------------------------------------------------|----------------|--------------------------------------|----------------|----------------------------------------|----------------|
|                                                            |                | 6-31G                                | 6-31G+(d,p)    | 6-31G                                  | 6-31G+(d,p)    |
| Symmetry                                                   |                | C <sub>s</sub>                       | C <sub>s</sub> | C <sub>s</sub>                         | C <sub>s</sub> |
| $\langle\alpha\rangle$<br>(x 10 <sup>-22</sup> esu)        | (0)            | 3.8                                  | 3.8            | 4.2                                    | 4.1            |
|                                                            | (- $\omega$ )  | 4.2                                  | 4.2            | 4.6                                    | 4.5            |
| $\beta$<br>(x 10 <sup>-33</sup> esu)                       | (0)            | ~0                                   | ~0             | ~0                                     | ~0             |
|                                                            | (- $\omega$ )  | ~0                                   | ~0             | ~0                                     | ~0             |
|                                                            | (-2 $\omega$ ) | ~0                                   | ~0             | ~0                                     | ~0             |
| $\gamma_{xxxx}/\gamma_{yyyy}$<br>(x 10 <sup>-36</sup> esu) | (0)            | 1285.0                               | 1190.0         | 1415.0                                 | 1338.3         |
|                                                            | (- $\omega$ )  | 2341.7                               | 2195.0         | 2301.7                                 | 2211.7         |
|                                                            | (-2 $\omega$ ) | 3585.0                               | 42735.0        | 11665.0                                | 12455.0        |
| $\gamma_{yyxx}$<br>(x 10 <sup>-36</sup> esu)               | (0)            | 428.3                                | 400.0          | 473.3                                  | 446.7          |
|                                                            | (- $\omega$ )  | 1161.7                               | 1100.0         | 1013.3                                 | 983.3          |
|                                                            | (-2 $\omega$ ) | 21836.7                              | 26956.7        | 5490.0                                 | 5925.0         |

Ref 1.1

Ref 2.1

## 2.2 Armchair graphene nanoflake: NLO polarizabilities calculated using various DFT exchange and correlation functional forms.

**Table S2:** Armchair graphene nanoflake of width  $\sim 24$  Å. The polarizabilities calculated using the PBE, PBE+D2, B3LYP, wB97XD, M062X, and , PBE0+GD3 functional forms together with 6-31G basis set;  $\alpha$ 's,  $\beta$ 's, and  $\gamma$ 's are the polarizability, first hyperpolarizability, and second hyperpolarizability, respectively. The frequency-dependent (hyper) polarizabilities are calculated at  $\lambda=1064$  nm.

|                                                                 |                | Exchange and Correlational functional form |                |                |        |          |          |
|-----------------------------------------------------------------|----------------|--------------------------------------------|----------------|----------------|--------|----------|----------|
| Armchair graphene nanoflake (C <sub>180</sub> H <sub>72</sub> ) |                | PBE                                        | PBE+GD2        | B3LYP          | wB97XD | M062X    | PBE0+GD3 |
| Symmetry                                                        |                | C <sub>1</sub>                             | C <sub>1</sub> | C <sub>1</sub> | C1     | C1       | C1       |
| $\langle\alpha\rangle$<br>(x 10 <sup>-22</sup> esu)             | (0)            | 5.2                                        | 5.2            | 4.9            | 4.2    | 4.6      | 4.6      |
|                                                                 | (- $\omega$ )  | 7.0                                        | 7.0            | 5.9            | 4.6    | 5.3      | 5.3      |
| $\beta$<br>(x 10 <sup>-33</sup> esu)                            | (0)            | 3.5                                        | 3.5            | 3.1            | 6.4    | 6.1      | 6.1      |
|                                                                 | (- $\omega$ )  | 4.4                                        | 4.5            | 3.6            | 7.6    | 6.2      | 6.2      |
|                                                                 | (-2 $\omega$ ) | 17.2                                       | 17.6           | 105.0          | 7.5    | 40.2     | 40.2     |
| $\gamma_{xxxx}/\gamma_{yyyy}$<br>(x 10 <sup>-36</sup> esu)      | (0)            | 3686                                       | 3686           | 2312           | 1415   | 2521.6   | 2521.6   |
|                                                                 | (- $\omega$ )  | 25477                                      | 25479          | 8217           | 2302   | 6177.5   | 6177.5   |
|                                                                 | (-2 $\omega$ ) | 319                                        | 317            | 12923          | 11665  | -68678.8 | -68678.8 |
| $\gamma_{yyxx}$<br>(x 10 <sup>-36</sup> esu)                    | (0)            | 1229                                       | 1229           | 903            | 473    | 840.2    | 840.2    |
|                                                                 | (- $\omega$ )  | 21632                                      | 21631          | 8611           | 1013   | 3392.6   | 3392.6   |
|                                                                 | (-2 $\omega$ ) | 1266                                       | 1266           | 9850           | 5490   | -45023.8 | -45023.8 |

### 2.3 Zigzag and armchair graphene nanoflakes: Frontier molecular orbitals

The molecular orbitals near Fermi energy are found to be associated with either the edge atoms for zigzag nanoflakes or the atoms of the central region for the armchair nanoflakes.

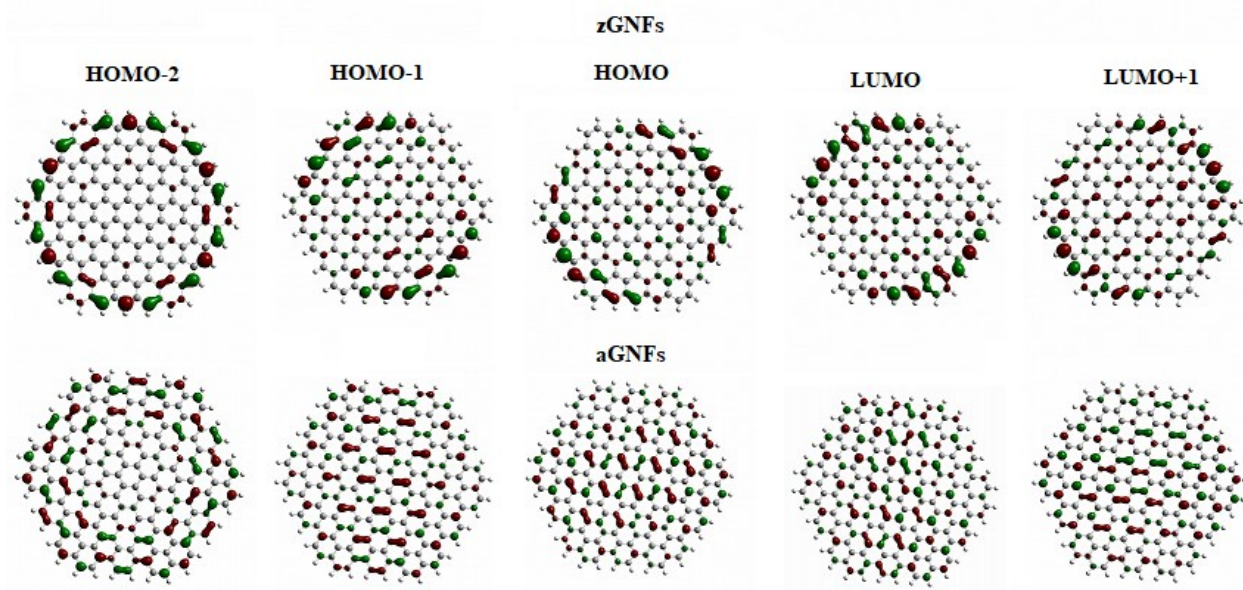

**Figure S2:** Frontier molecular orbital plots for zigzag and armchair graphene nanoflakes. HOMO is the highest occupied molecular orbital and LUMO is the lowest unoccupied molecular orbital.

### 3.0: p-Nitroaniline

p-nitroaniline consists of a benzene ring in which a nitro group is a para to an amino group.

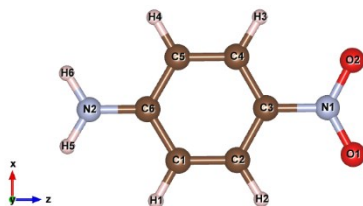

**Figure S3:** A ball and stick model of p-nitroaniline. Color code: C: grey, O: red, N: blue, H: white.

**Table S3:** *p*-nitroaniline: A comparison of the calculated second hyperpolarizability ( $\beta$ ) with  $\beta_{\text{vec}} = \beta_i = 1/3 \sum (\beta_{ijj} + \beta_{jij} + \beta_{jii})$  with  $i=z$  and  $j=x$  and  $y$ .  $\lambda$  is 1064 nm.

| Method                                                    | Reference                          | $\beta_{\text{vec}}(0;0,0)$<br>( $10^{-30}$ esu) | $\beta_{\text{vec}}(-2w;w,w)$<br>( $10^{-30}$ esu) |
|-----------------------------------------------------------|------------------------------------|--------------------------------------------------|----------------------------------------------------|
| DFT (wB97XD)<br>(6-31 G basis set)                        | This work                          | 6.88                                             | 10.8                                               |
| DFT(M062X)<br>(6-31G basis set)                           | This work                          | 6.97                                             | 10.91                                              |
| DFT(PBE0+GD3)<br>(6-31G basis set)                        | This work                          | 7.25                                             | 12.34                                              |
| Hartree-Fock<br>(DZV basis set)                           | Karna 91<br>(Table V)              | 4.37                                             | 6.20                                               |
| DFT (LDA)<br>(standard auxiliary basis<br>– ADF program*) | Gisbergen<br>(Erratum-<br>Table I) | 7.45                                             | 16.99                                              |
| B3LYP<br>(aug-cc-pVDZ basis)                              | Salek 02<br>(Table IV)             | 6.72                                             | 12.33                                              |
| Experiment<br>(gas phase-EFISH)                           | Kaatz 98                           |                                                  | $15.44 \pm 0.63$                                   |

\*ADF is the Amsterdam Density Functional package.

**Karna 91:** S. P. Karna and P. N. Prasad, Nonlinear optical properties of *p*-nitroaniline: An *ab initio* time-dependent coupled perturbed Hartree–Fock study, *J. Chem. Phys.*, 94, 1177 (1991)

**Gisbergen 99:** S. J. A. van Gisbergen, J. G. Snijders, and E. J. Baerends, Calculating frequency-dependent hyperpolarizabilities using time-dependent density functional theory, *J. Chem. Phys.* 109, 10644 (1998) –

**Erratum:** *J. Chem. Phys.* 111, 6652 (1999).

**Salek 02:** P. Salek, O. Vahtras, T. Helgaker, and H. Ågren, Density-functional theory of linear and nonlinear time-dependent molecular properties, *J. Chem. Phys.* 117, 9630 (2002).

**Kaatz 98:** P. Kaatz, E. A. Donley, and D. P. Shelton, A comparison of molecular hyperpolarizabilities from gas and liquid phase measurements, *J. Chem. Phys.* 108, 849 (1998).

Referee 1.2

### 3.0 Nanoflake heterostructure:

#### 3.1 Bonding

Ref 1.4

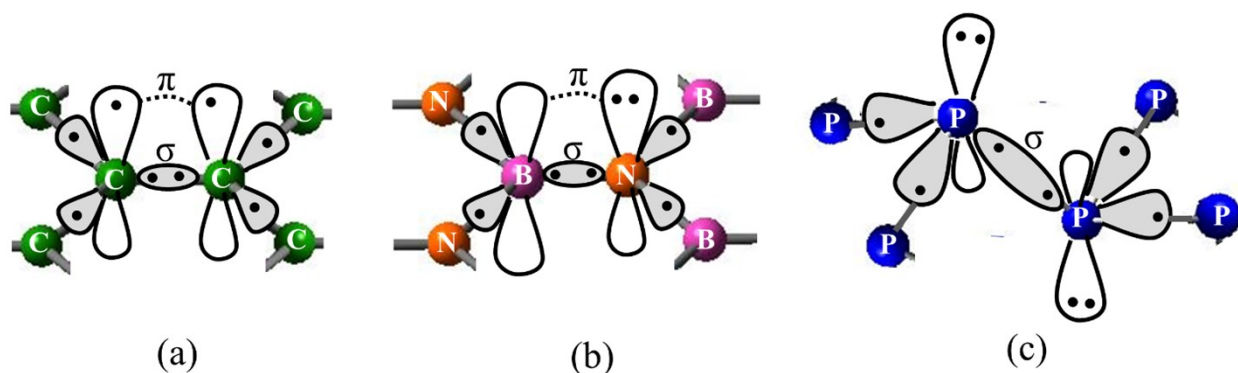

**Fig S4.** Bonding in pristine (a) graphene, (b) h-BN monolayer, and (c) phosphorene displaying  $sp^2$ , and  $sp^3$  hybridization. The calculated bond lengths are 1.43 Å ( $R_{(C-C)}$ ), 1.45 Å ( $R_{(B-N)}$ ), and 2.37 Å ( $R_{(P-P)}$ ) in the pristine graphene, h-BN monolayer and phosphorene, respectively.

#### 3.2 Charge Density

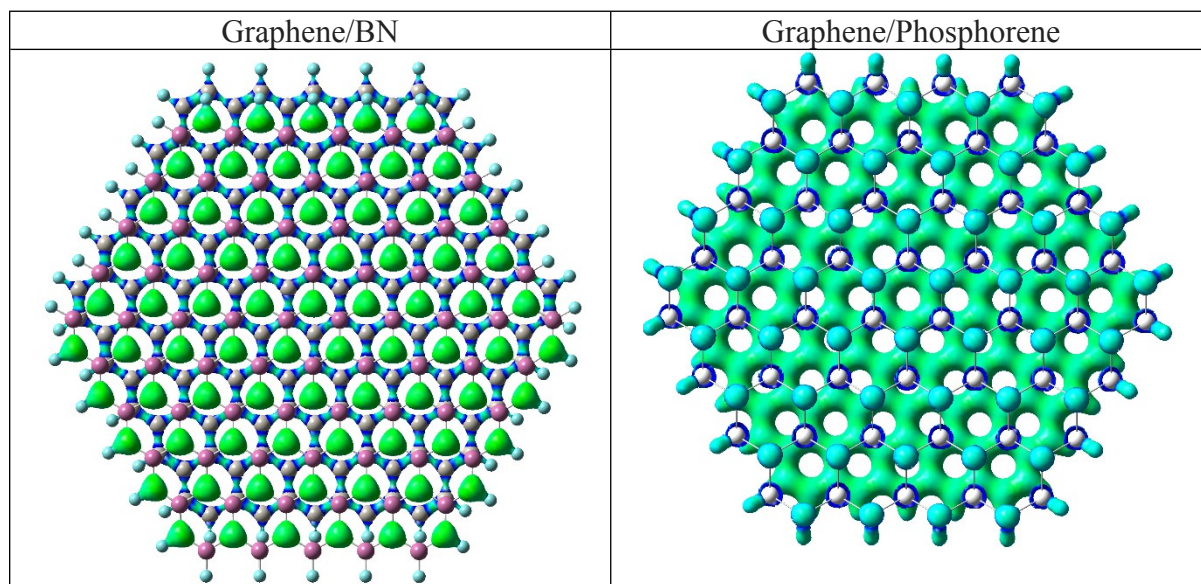

**Figure S5:** Total charge density of zigzag AB-stacked Graphene/BN and Graphene/Phosphorene. The isovalue of the charge density contour is  $\sim 0.3$  e-/a.u<sup>3</sup> for both graphene/BN and graphene/phosphorene heterostructures.



### 3.3 Graphene/BN nanoflake heterostructure: $\beta$ vs. interlayer dependence

**Table S4:** Graphene/BN heterostructure nanoflakes: Calculated DFT (wB97XD) results of zigzag AA-stacked configuration showing the relationship between the interlayer distance and NLO polarizability;  $\mu$  is dipole moment.  $\alpha$ 's,  $\beta$ 's, and  $\gamma$ 's are the polarizability, first hyperpolarizability, and second hyperpolarizability values, respectively.  $\lambda$  is 1064 nm.

|                                                           |                   | AA-stacked                      |          |
|-----------------------------------------------------------|-------------------|---------------------------------|----------|
|                                                           |                   | Case A                          | Case B   |
| Symmetry                                                  |                   | $C_1$                           | $C_1$    |
| Interlayer distance, Å                                    |                   | 3.4<br>(equilibrium separation) | 3.0      |
| $E_{\text{(HOMO-LUMO gap)}}$ , eV                         |                   | 3.4                             | 3.4      |
| $\mu$ (D)                                                 |                   | 3.3                             | 3.9      |
| $\langle \alpha \rangle$<br>( $\times 10^{-22}$ esu)      | (0)               | 5.4                             | 5.4      |
|                                                           | ( $-\omega$ )     | 6.1                             | 6.2      |
| $\beta$<br>( $\times 10^{-33}$ esu)                       | $\beta(0)$        | 5620.8                          | 18677.0  |
|                                                           | $\beta(-\omega)$  | 7116.5                          | 52712.0  |
|                                                           | $\beta(-2\omega)$ | 78504.8                         | 122449.0 |
| $\gamma_{xxxx}/\gamma_{yyyy}$<br>( $\times 10^{-36}$ esu) | (0)               | 1630.0                          | 1741.7   |
|                                                           | ( $-\omega$ )     | 4160.0                          | 4985.7   |
|                                                           | ( $-2\omega$ )    | -695.0                          | -20347.3 |
| $\gamma_{yyxx}$<br>( $\times 10^{-36}$ esu)               | (0)               | 542.6                           | 581.2    |
|                                                           | ( $-\omega$ )     | 2543.7                          | 3192.5   |
|                                                           | ( $-2\omega$ )    | 10659.5                         | -5612.7  |

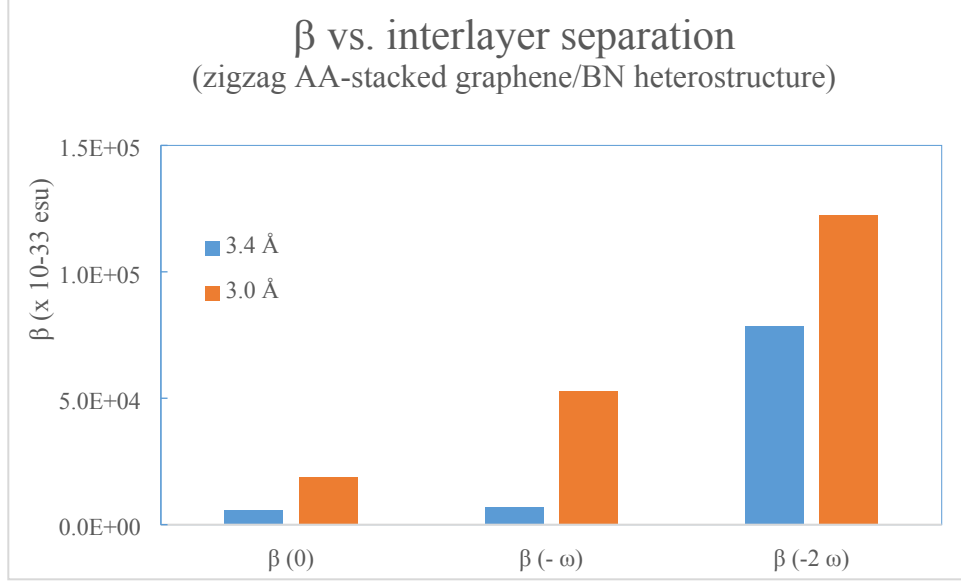

**Fig S6.**  $\beta$  vs interlayer separation for the zigzag AA-stacked graphene/BN heterostructure.

#### 4.0 Estimation of second-harmonic generation (SHG):

SHG or frequency doubling is estimated [1, 2] as

$$\text{SHG} = \chi^{(2)}/2 = (\beta * 2\pi / V)/2 \quad (1)$$

Here,  $\beta$  is the (microscopic) first hyperpolarizability and  $\chi^{(2)}$  is the (macroscopic) second-order susceptibility.  $V$  is volume approximated as  $(t_{\text{layer}} \times R_{\text{interlayer}})$  where  $t$  is the thickness and  $R_{\text{interlayer}}$  is the interlayer separation. The thickness of a heterostructure,  $t$  is the sum of the thickness of the first layer, interlayer separation, and the thickness of the second layer. We have taken the thickness of graphene and h-BN monolayer to be 0.335 nm [2] and that of phosphorene is taken to be 0.85 nm [3].

**Table S5:** The estimated SHG values of pristine nanoflakes and their heterostructures. Atomic units are used (volume: Bohr<sup>3</sup>)

| Zigzag          |                        | Graphene | BN       | Phosphorene | C/BN-AA stacked | C/BN-AB stacked | C/P       |
|-----------------|------------------------|----------|----------|-------------|-----------------|-----------------|-----------|
| Atomic Unit     | Area                   | 1315.7   | 1315.7   | 1315.7      | 1315.7          | 1315.7          | 1315.7    |
|                 | thickness              | 6.3      | 6.3      | 12.3        | 19.1            | 18.7            | 38.94     |
|                 | Volume                 | 8288.91  | 8288.91  | 16183.11    | 25129.87        | 24603.59        | 51233.36  |
|                 | 2 PI/V                 | 0.0008   | 0.0008   | 0.0004      | 0.0002          | 0.0003          | 0.0001    |
|                 | $\beta$ (-2 $\omega$ ) | 0.14     | 19.71    | 1.68        | 9087.10         | 69088.00        | 419586.40 |
|                 | X <sup>(2)</sup>       | 0.0001   | 0.0149   | 0.0007      | 2.2709          | 17.6345         | 51.4314   |
| pm/V            | X <sup>(2)</sup>       | 0.0002   | 0.0290   | 0.0013      | 4.4162          | 34.2937         | 100.0183  |
| pm/V            | SHG                    | 0.0001   | 0.0145   | 0.0006      | 2.2081          | 17.1469         | 50.0091   |
| <b>Armchair</b> |                        |          |          |             |                 |                 |           |
| Atomic Unit     | Area                   | 1615.80  | 1615.80  | 1615.80     | 1615.80         | 1615.80         | 1615.80   |
|                 | thickness              | 6.3      | 6.3      | 12.3        | 19.1            | 18.7            | 38.94     |
|                 | Volume                 | 10179.54 | 10179.54 | 19874.34    | 30861.78        | 30215.46        | 62919.25  |
|                 | 2 PI/V                 | 0.0006   | 0.0006   | 0.0003      | 0.0002          | 0.0002          | 0.0001    |
|                 | $\beta$ (-2 $\omega$ ) | 0.14     | 25.96    | 1.90        | 1465.10         | 11956.90        | 15294.70  |
|                 | X <sup>(2)</sup>       | 0.0001   | 0.0160   | 0.0006      | 0.2981          | 2.4851          | 1.5266    |
| pm/V            | X <sup>(2)</sup>       | 0.0002   | 0.0311   | 0.0012      | 0.5798          | 4.8328          | 2.9687    |
| pm/V            | SHG                    | 0.0001   | 0.0156   | 0.0006      | 0.2899          | 2.4164          | 1.4844    |

#### References:

1. <https://www.crystal.unito.it/Manuals/crystal17.pdf>
2. R. Dovesi, A. Erba, R. Orlando, C. M. Zicovich-Wilson, B. Civalleri, L. Maschio, M. Rerat, S. Casassa, J. Baima, S. Salustro, B. Kirtman, *WIREs Comput Mol Sci.* 8, e1360 (2018).
3. Ni et al., “Graphene Thickness Determination Using Reflection and Contrast Spectroscopy”, *Nano Lett.* 7, 2758-2763 (2007).
4. Lu et al., “Plasma-assisted fabrication of monolayer phosphorene and its Raman characterization”, *Nano Res.* 7, 853–859 (2014).
